# Supplementary figures and images for: ADHD in girls and boys – gender differences in co-existing symptoms and executive function measures
Source: Springer Nature journal article supplement (doi:10.1186/1471-244x-13-298), 2013-11-09

# Symptom Ratings

Predictors

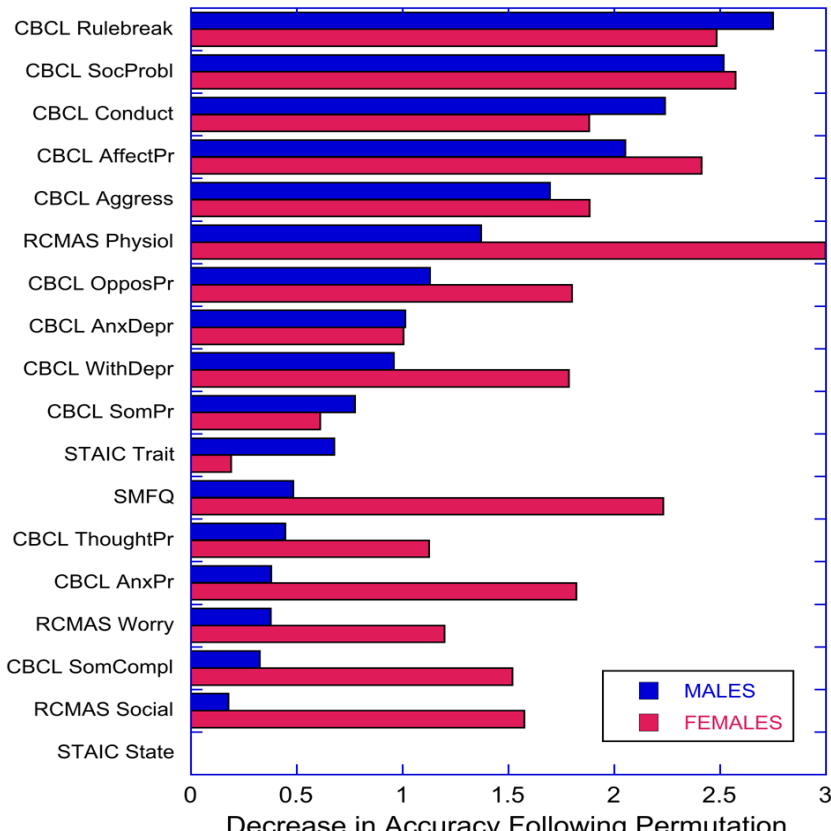

Supplement: 12888_2012_1463_MOESM1_ESM.pdf [file 12888_2012_1463_MOESM1_ESM.pdf]

# Cognitive Measures

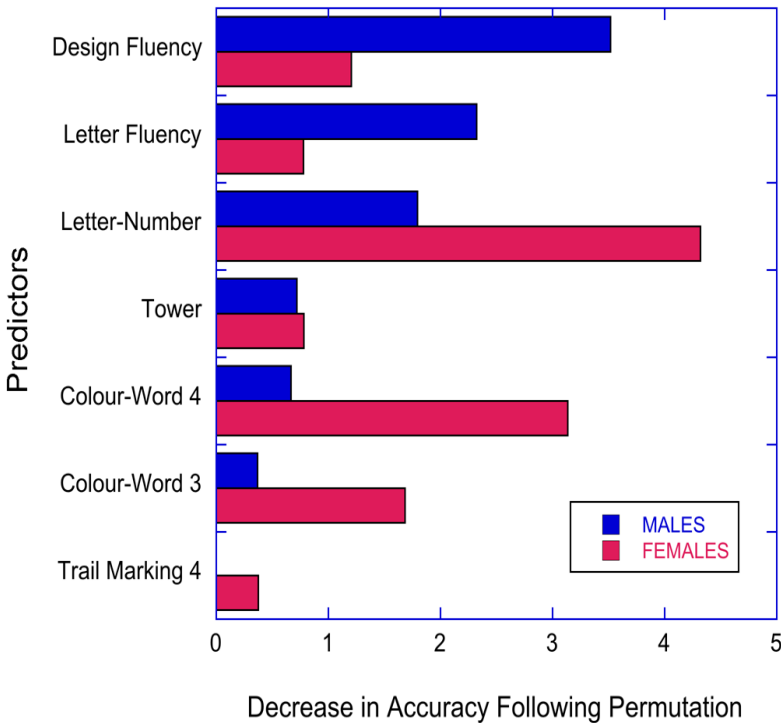

Supplement: 12888_2012_1463_MOESM2_ESM.pdf [file 12888_2012_1463_MOESM2_ESM.pdf]

# Behavior Rating Inventory of Executive Functions

Predictors

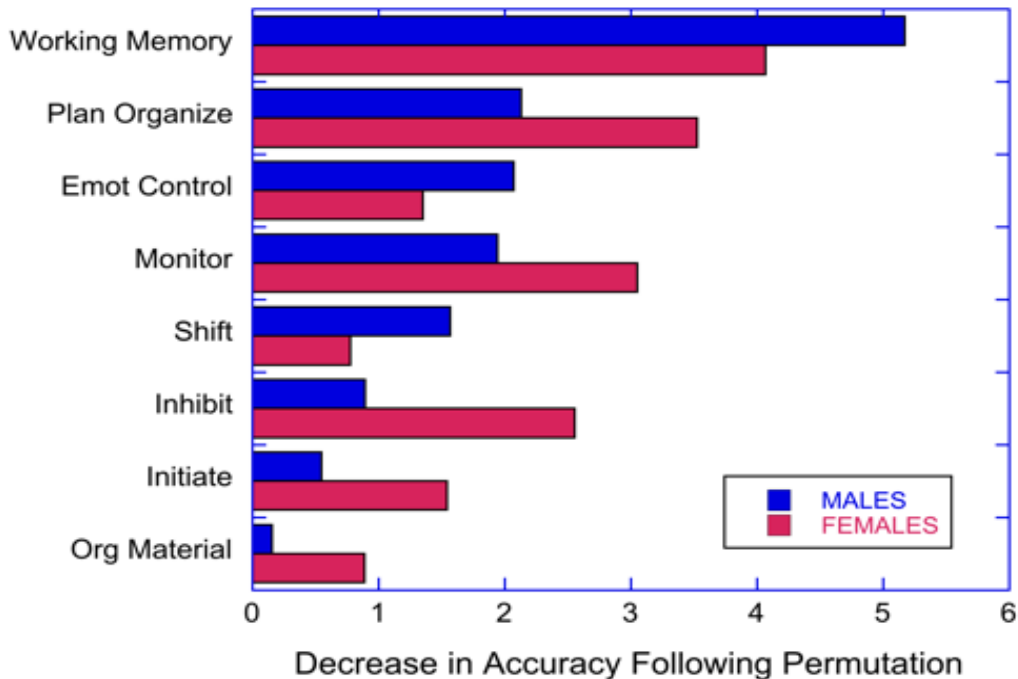

Supplement: 12888_2012_1463_MOESM3_ESM.pdf [file 12888_2012_1463_MOESM3_ESM.pdf]
